# Supplementary material
Source: PubMed Central journal article supplement (PMC6952054)
Supplement: jnm177295SupplementaryData.pdf [file jnm177295SupplementaryData.pdf]

**Supplemental Table 1.** Imaging protocol conformation of patients by imaging site

| Parameters                                 | Imaging site |              |              |                    |
|--------------------------------------------|--------------|--------------|--------------|--------------------|
|                                            | UWCCC        | MSKCC        | NCI          | All                |
| <b>Patients (no.)</b>                      | 18           | 11           | 6            | <b>35</b>          |
| <b>Postinjection time (min), mean (SD)</b> | 60.5 (1.3)   | 69.0 (9.0)   | 60.6 (3.6)   | <b>63.3 (6.7)</b>  |
| <b>Injected dose (MBq), mean (SD)</b>      | 177.6 (9.3)  | 147.3 (25.5) | 135.8 (31.9) | <b>159.8 (9.7)</b> |
